# Supplementary material for: Specific PFKFB3 Inhibitor Memorably Ameliorates Intervertebral Disc Degeneration via Inhibiting NF‐κB and MAPK Signaling Pathway and Reprogramming of Energy Metabolism of Nucleus Pulposus Cells
Source: Hindawi journal article supplement (doi:10.1155/2022/7548145), 2022-01-01
Supplement: f1 [file 7548145.f1.pdf]

**A**  
**Seahorse XF Cell Mito Stress Test Profile**  
 Mitochondrial Respiration

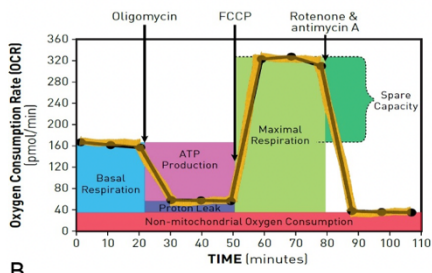

| Parameter Value                      | Equation                                                                                                    |
|--------------------------------------|-------------------------------------------------------------------------------------------------------------|
| Non-mitochondrial Oxygen Consumption | Minimum rate measurement after Rotenone/antimycin A injection                                               |
| Basal Respiration                    | (Last rate measurement before first injection) – (Non-Mitochondrial Respiration Rate)                       |
| Maximal Respiration                  | (Maximum rate measurement after FCCP injection) – (Non-Mitochondrial Respiration)                           |
| H+ (Proton) Leak                     | (Minimum rate measurement after Oligomycin injection) – (Non-Mitochondrial Respiration)                     |
| ATP Production                       | (Last rate measurement before Oligomycin injection) – (Minimum rate measurement after Oligomycin injection) |
| Spare Respiratory Capacity           | (Maximal Respiration) – (Basal Respiration)                                                                 |
| Spare Respiratory Capacity as a %    | (Maximal Respiration) / (Basal Respiration) × 100                                                           |
| Acute Response                       | (Last rate measurement before oligomycin injection) – (Last rate measurement before acute injection)        |
| Coupling Efficiency                  | ATP Production Rate / (Basal Respiration Rate) × 100                                                        |

**B**  
**Glycolytic Function**

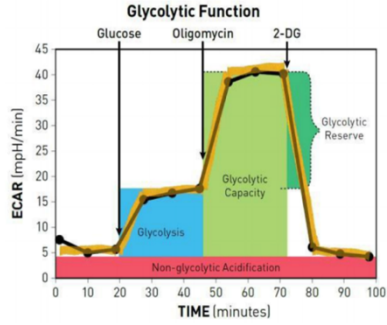

**Parameter**      **Rate Measurement Equation Used by Report Generator**

|                              |                                                                                                           |
|------------------------------|-----------------------------------------------------------------------------------------------------------|
| Glycolysis                   | (Maximum rate measurement before Oligomycin injection) – (Last rate measurement before Glucose injection) |
| Glycolytic Capacity          | (Maximum rate measurement after Oligomycin injection) – (Last rate measurement before Glucose injection)  |
| Glycolytic Reserve           | (Glycolytic Capacity) – (Glycolysis)                                                                      |
| Glycolytic Reserve as a %    | (Glycolytic Capacity Rate) / (Glycolysis) × 100                                                           |
| Non-Glycolytic Acidification | Last rate measurement prior to glucose injection                                                          |
| Acute Response               | (Last measurement rate before glucose injection – Last rate measurement before acute injection)           |
